# Supplementary material for: BET inhibition in advanced cutaneous T cell lymphoma is synergistically potentiated by BCL2 inhibition or HDAC inhibition
Source: PubMed Central journal article supplement (PMC6044378; doi:10.18632/oncotarget.25670), 2018-06-26
Supplement: oncotarget-09-29193-s001.pdf [file oncotarget-09-29193-s001.pdf]

## BET inhibition in advanced cutaneous T cell lymphoma is synergistically potentiated by BCL2 inhibition or HDAC inhibition

### SUPPLEMENTARY MATERIALS

#### SUPPLEMENTARY REFERENCES

1. Chou TC. Drug combination studies and their synergy quantification using the Chou-Talalay method. *Cancer Res.* 2010; 70:440–446.
2. Chou TC. Theoretical basis, experimental design, and computerized simulation of synergism and antagonism in drug combination studies. *Pharmacol Rev.* 2006; 58:621–681.

**Supplementary Table 1: Mean IC<sub>50</sub> ± SEM [μM], calculated from dose-response curves for each BET inhibitor (JQ1, ABBV-075, I-BET762, CPI-0610)**

|                              | JQ1          | ABBV-075     | I-BET762      | CPI-0610     |
|------------------------------|--------------|--------------|---------------|--------------|
| <b>Patient-derived cells</b> |              |              |               |              |
| Pt 1                         | 2.35 ± 0.36  | 0.47 ± 0.07  |               |              |
| Pt 4                         | 2.63 ± 0.17  | 0.13 ± 0.01  |               |              |
| Pt 5                         | 3.12 ± 0.34  | 0.55 ± 0.06  |               |              |
| Pt 7                         | 4.76 ± 0.74  | 1.00 ± 0.15  | 95.15 ± 21.66 | 37.56 ± 8.74 |
| Pt 9                         | 5.45 ± 0.55  | 0.68 ± 0.08  | 55.33 ± 6.68  | 21.77 ± 3.01 |
| Pt 10                        | 5.49 ± 0.88  | 0.41 ± 0.06  | 106.1 ± 36.80 | 14.66 ± 3.55 |
| Pt 11                        | 15.56 ± 2.18 | 1.59 ± 0.21  | 174.3 ± 65.24 | 44.54 ± 5.57 |
| Pt 12                        | 20.31 ± 4.03 | 6.74 ± 1.06  | 446.7 ± 366.1 | 72.33 ± 17.3 |
| <b>CTCL cell lines</b>       |              |              |               |              |
| MyLa                         | 4.12 ± 0.61  | 0.29 ± 0.02  | 11.1 ± 1.78   | 17.55 ± 2.36 |
| HH                           | 0.89 ± 0.15  | 0.01 ± 0.004 | 0.59 ± 0.10   | 1.62 ± 0.34  |
| Sez4                         | 0.81 ± 0.15  | 0.05 ± 0.01  | 3.73 ± 0.45   | 6.25 ± 0.79  |
| Hut78                        | 1.21 ± 0.13  | 0.02 ± 0.003 | 0.77 ± 0.15   | 1.13 ± 0.22  |

ABBV-075 has the lowest IC<sub>50</sub>, followed by JQ1 in all patient-derived samples. Pt, patient.

**Supplementary Table 2: Combination index (CI) ± SEM as calculated by Chou-Talalay method at 10% viability (0.9 fraction affected) for patient-derived cells and CTCL cell lines**

|                              | JQ1 + Venetoclax | ABBV-075 + Venetoclax |
|------------------------------|------------------|-----------------------|
| <b>Patient-derived cells</b> |                  |                       |
| Pt 1                         | 0.22 ± 0.04      | 0.11 ± 0.01           |
| Pt 3                         | 0.26 ± 0.02      |                       |
| Pt 4                         | 0.26 ± 0.02      |                       |
| Pt 5                         | 0.56 ± 0.05      | 0.83 ± 0.11           |
| Pt 7                         | 0.27 ± 0.04      |                       |
| Pt 9                         | 0.49 ± 0.08      | 0.39 ± 0.06           |
| Pt 10                        | 0.11 ± 0.01      | 0.03 ± 0.01           |
| Pt 11                        | 0.20 ± 0.02      | 0.12 ± 0.01           |
| Pt 12                        | 0.08 ± 0.01      | 0.05 ± 0.01           |
| <b>Cell Lines</b>            |                  |                       |
| MyLa                         | 0.72 ± 0.35      |                       |
| HH                           | 1.57 ± 0.20      |                       |
| Sez4                         | 0.56 ± 0.12      |                       |
| Hut78                        | 1.30 ± 0.42      |                       |

|                     |          |
|---------------------|----------|
| Strong synergy      | <0.3     |
| Moderate synergy    | 0.3–0.7  |
| Weak synergy        | 0.7–0.9  |
| Additive            | 0.9–1.1  |
| Weak antagonism     | 1.1–1.45 |
| Moderate antagonism | 1.45–3.3 |
| Strong antagonism   | >3.3     |

|                              | JQ1 + Vorinostat | ABBV-075 + Vorinostat |
|------------------------------|------------------|-----------------------|
| <b>Patient-derived cells</b> |                  |                       |
| Pt 1                         | 0.24± 0.03       | 0.19 ± 0.03           |
| Pt 3                         | 0.29 ± 0.04      |                       |
| Pt 4                         | 0.22 ± 0.02      |                       |
| Pt 5                         | 0.37 ± 0.17      | 0.37 ± 0.29           |
| Pt 7                         | 0.19 ± 0.01      |                       |
| Pt 9                         | 0.24 ± 0.03      | 0.20 ± 0.03           |
| Pt 10                        | 0.17 ± 0.02      | 0.37 ± 0.04           |
| Pt 11                        | 0.26 ± 0.02      | 0.39 ± 0.03           |
| Pt 12                        | 0.27 ± 0.03      | 0.31 ± 0.05           |
| <b>Cell Lines</b>            |                  |                       |
| MyLa                         | 0.28 ± 0.07      |                       |
| HH                           | 1.06 ± 1.24      |                       |
| Sez4                         | 0.34 ± 0.12      |                       |
| Hut78                        | 0.90 ± 1.18      |                       |

|                              | JQ1 + Romidepsin | ABBV-075 + Romidepsin |
|------------------------------|------------------|-----------------------|
| <b>Patient-derived cells</b> |                  |                       |
| Pt 1                         | 0.26 ± 0.03      | 0.27 ± 0.03           |
| Pt 3                         | 0.61 ± 0.68      |                       |
| Pt 4                         | 0.39 ± 0.08      |                       |
| Pt 5                         | 0.55 ± 0.29      | 0.56 ± 0.36           |
| Pt 7                         | 0.31 ± 0.06      |                       |
| Pt 9                         | 0.31 ± 0.09      | 0.31 ± 0.11           |
| Pt 10                        | 0.21 ± 0.02      | 0.28 ± 0.02           |
| Pt 11                        | 0.47 ± 0.10      | 0.43 ± 0.08           |
| Pt 12                        | 0.34 ± 0.09      | 0.30 ± 0.08           |
| <b>Cell Lines</b>            |                  |                       |
| MyLa                         | 0.39 ± 0.13      |                       |
| HH                           | 0.25 ± 1.93      |                       |
| Sez4                         | 0.46 ± 0.56      |                       |
| Hut78                        | 0.99 ± 0.86      |                       |

As per legend, strong synergy CI < 0.3, moderate synergy 0.3–0.7, weak synergy 0.7–0.9, additive effect 0.9–1.1, weak antagonism 1.1–1.45, moderate antagonism 1.45–3.3, and strong antagonism >3.3 (adapted from Chou) [1, 2]. All patient-derived samples demonstrated synergy when JQ1 was combined with venetoclax, vorinostat, or romidepsin.

**Supplementary Table 3: Change in expression of *MYC*, *BCL2*, *BCL2L1*, *BCL2L1L*, *CDKN1A* shown as fold change from untreated, following 24 hour treatments with 10  $\mu$ M JQ1, 50 nM venetoclax, 2  $\mu$ M vorinostat and 5 nM romidpesin as single drugs or in combinations**

|                               | JQ1          | Venetoclax   | JQ1+<br>Venetoclax | Vorinostat   | JQ1+<br>Vorinostat | Romidepsin    | JQ1+<br>Romidepsin |
|-------------------------------|--------------|--------------|--------------------|--------------|--------------------|---------------|--------------------|
| <b>Gene (protein):</b>        |              |              |                    |              |                    |               |                    |
| <b><i>MYC</i> (MYC)</b>       |              |              |                    |              |                    |               |                    |
| <i>Pt 1</i>                   | 1.48         | 1.12         | 1.36               | -2.19        | -16.51             | -6.32         | -55.12             |
| <i>Pt 2</i>                   | -1.90        | -1.06        | -1.89              | -3.83        | -21.38             | -28.81        | -29.48             |
| <i>Pt 4</i>                   | -1.37        | -1.06        | -1.46              | -2.17        | -6.06              | -52.08        | -158.37            |
| <i>Pt 7</i>                   | -2.64        | -1.33        | -2.40              | -8.15        | -29.37             | -24.16        | -149.73            |
| <i>Pt 9</i>                   | -1.18        | 1.00         | 1.08               | -2.09        | -8.02              | -10.40        | -67.18             |
| <i>Pt 11</i>                  | -1.16        | -1.04        | -1.35              | -5.84        | -61.41             | -60.08        | -296.34            |
| <i>Pt 12</i>                  | -1.58        | -1.09        | -1.65              | -6.50        | -75.66             | -23.46        | -282.13            |
| <b>Avg*</b>                   | <b>-1.28</b> | <b>-1.05</b> | <b>-1.29</b>       | <b>-3.33</b> | <b>-15.19</b>      | <b>-17.12</b> | <b>-80.59</b>      |
| <b><i>BCL2</i> (BCL2)</b>     |              |              |                    |              |                    |               |                    |
| <i>Pt 1</i>                   | -1.48        | 1.29         | -1.08              | -1.63        | -31.76             | -2.66         | -64.58             |
| <i>Pt 2</i>                   | -2.28        | -1.04        | -2.84              | -1.36        | -31.54             | -2.70         | -6.62              |
| <i>Pt 4</i>                   | -4.10        | 1.12         | -4.23              | -2.56        | -14.34             | -13.96        | -108.21            |
| <i>Pt 7</i>                   | -4.53        | 1.05         | -5.29              | -6.10        | -165.88            | -12.40        | -317.25            |
| <i>Pt 9</i>                   | -3.15        | 1.17         | 1.08               | -1.13        | -40.68             | -2.02         | -128.99            |
| <i>Pt 11</i>                  | -2.16        | 1.35         | -1.87              | -2.36        | -55.84             | -10.42        | -188.14            |
| <i>Pt 12</i>                  | -3.11        | 1.15         | -2.60              | -3.62        | -301.53            | -3.41         | -502.04            |
| <b>Avg*</b>                   | <b>-2.61</b> | <b>1.16</b>  | <b>-2.19</b>       | <b>-2.01</b> | <b>-37.88</b>      | <b>-3.93</b>  | <b>-36.06</b>      |
| <b><i>BCL2L1</i> (BCL-XL)</b> |              |              |                    |              |                    |               |                    |
| <i>Pt 1</i>                   | -3.61        | 1.13         | -2.90              | -2.28        | -6.78              | -3.76         | -8.94              |
| <i>Pt 2</i>                   | -3.62        | -1.14        | -2.38              | -1.81        | -3.26              | -2.93         | -3.65              |
| <i>Pt 4</i>                   | -4.73        | -1.02        | -4.82              | -2.11        | -8.07              | -8.85         | -19.66             |
| <i>Pt 7</i>                   | -4.38        | 1.14         | -2.72              | -5.02        | -10.58             | -8.06         | -12.61             |
| <i>Pt 9</i>                   | -2.59        | 1.34         | -1.66              | 1.04         | -6.62              | -2.02         | -7.31              |
| <i>Pt 11</i>                  | -5.67        | 1.18         | -5.49              | -2.37        | -10.79             | -6.88         | -9.47              |
| <i>Pt 12</i>                  | -4.57        | 1.03         | -4.03              | -2.33        | -9.68              | -2.80         | -10.39             |
| <b>Avg*</b>                   | <b>-3.95</b> | <b>1.10</b>  | <b>-2.95</b>       | <b>-1.97</b> | <b>-6.87</b>       | <b>-3.80</b>  | <b>-8.19</b>       |
| <b><i>BCL2L1L</i> (BIM)</b>   |              |              |                    |              |                    |               |                    |
| <i>Pt 1</i>                   | 3.01         | 1.28         | 3.45               | 4.68         | 1.72               | 6.232         | 2.37               |
| <i>Pt 2</i>                   | 1.92         | 1.69         | 1.14               | 1.59         | -1.67              | 6.12          | 1.87               |
| <i>Pt 4</i>                   | 1.69         | -1.19        | 1.47               | 1.46         | 1.01               | 1.42          | 1.25               |
| <i>Pt 7</i>                   | 1.68         | 1.01         | 1.75               | 2.15         | 1.76               | 3.66          | 2.18               |
| <i>Pt 9</i>                   | 1.78         | 1.08         | 1.83               | 1.55         | 1.07               | 4.57          | 2.47               |
| <i>Pt 11</i>                  | 1.45         | -1.01        | 1.39               | 1.86         | 1.39               | 2.78          | 1.58               |
| <i>Pt 12</i>                  | 2.04         | -1.01        | 1.99               | 3.39         | 2.61               | 6.84          | 3.80               |
| <b>Avg*</b>                   | <b>1.94</b>  | <b>1.12</b>  | <b>1.86</b>        | <b>2.38</b>  | <b>1.45</b>        | <b>4.53</b>   | <b>2.22</b>        |
| <b><i>CDKN1A</i> (P21)</b>    |              |              |                    |              |                    |               |                    |
| <i>Pt 1</i>                   | 1.20         | 1.12         | 1.88               | -1.18        | -2.04              | -1.26         | -3.33              |
| <i>Pt 2</i>                   | 2.35         | 1.19         | 4.01               | 1.16         | -1.08              | 1.27          | 1.95               |
| <i>Pt 4</i>                   | 1.83         | -1.13        | 1.69               | 2.31         | 3.31               | 1.46          | 1.83               |
| <i>Pt 7</i>                   | -1.12        | -1.49        | 1.47               | -1.31        | -1.63              | 1.20          | -1.46              |
| <i>Pt 9</i>                   | -1.99        | 1.21         | -1.24              | -1.04        | 1.29               | 1.25          | 2.06               |
| <i>Pt 11</i>                  | 2.05         | -3.78        | 2.60               | 1.31         | -1.14              | -1.10         | -1.38              |
| <i>Pt 12</i>                  | 2.81         | 1.20         | 3.53               | 4.67         | 3.44               | 7.02          | 3.47               |
| <b>Avg*</b>                   | <b>1.66</b>  | <b>-1.07</b> | <b>2.28</b>        | <b>1.72</b>  | <b>1.57</b>        | <b>1.99</b>   | <b>1.57</b>        |

Pt, patient.

\*average fold changes were calculated from average RQ values.

**Supplementary Table 4: Change in expression of *MYC* and *BCL2* shown as fold change from untreated, following 24 hour treatments with 2.5  $\mu$ M ABBV-075, 50 nM venetoclax, 2  $\mu$ M vorinostat and 5 nM romidepsin as single drugs or in combinations**

|                           | ABBV-075     | Venetoclax   | ABBV-075+<br>Venetoclax | Vorinostat   | ABBV-075+<br>Vorinostat | Romidepsin   | ABBV-075+<br>Romidepsin |
|---------------------------|--------------|--------------|-------------------------|--------------|-------------------------|--------------|-------------------------|
| <b>Gene (protein):</b>    |              |              |                         |              |                         |              |                         |
| <b><i>MYC</i> (MYC)</b>   |              |              |                         |              |                         |              |                         |
| <i>Pt 1</i>               | 1.26         | -1.09        | 1.00                    | -2.20        | -5.61                   | -4.44        | -6.19                   |
| <i>Pt 11</i>              | -1.43        | 1.01         | -1.30                   | -5.12        | -25.23                  | -33.89       | -75.18                  |
| <i>Pt 12</i>              | -2.95        | 1.24         | -3.02                   | -3.16        | -13.71                  | -12.00       | -48.95                  |
| <b><i>Avg*</i></b>        | <b>-1.03</b> | <b>-1.06</b> | <b>-1.49</b>            | <b>-3.11</b> | <b>-10.31</b>           | <b>-8.87</b> | <b>-15.37</b>           |
| <b><i>BCL2</i> (BCL2)</b> |              |              |                         |              |                         |              |                         |
| <i>Pt 1</i>               | -2.03        | 1.11         | -2.13                   | -1.90        | -17.15                  | -1.96        | -9.46                   |
| <i>Pt 11</i>              | -4.50        | 1.24         | -4.29                   | -3.04        | -20.33                  | -4.71        | -29.99                  |
| <i>Pt 12</i>              | -8.92        | 1.07         | -7.55                   | -2.94        | -52.61                  | -2.89        | -68.75                  |
| <b><i>Avg*</i></b>        | <b>-3.91</b> | <b>1.14</b>  | <b>-3.60</b>            | <b>-2.51</b> | <b>-23.72</b>           | <b>-2.81</b> | <b>-19.53</b>           |

Pt, patient. \*average fold changes were calculated from average RQ values.
